# Supplementary material for: The Inclusion of Rights of People with Disabilities and Women and Girls in Water, Sanitation, and Hygiene Policy Documents and Programs of Bangladesh and Cambodia: Content Analysis Using EquiFrame
Source: MDPI journal article supplement (doi:10.3390/ijerph18105087), 2021-05-11
Supplement: s1 [file s1]

**Table S1. Core concept coverage across the policy documents of Bangladesh and Cambodia**

| Policy                                                                         | Publication year | Disability inclusion      |                               | Gender inclusion          |                               |
|--------------------------------------------------------------------------------|------------------|---------------------------|-------------------------------|---------------------------|-------------------------------|
|                                                                                |                  | Core concept coverage (%) | Core concept high quality (%) | Core concept coverage (%) | Core concept high quality (%) |
| Bangladesh                                                                     |                  |                           |                               |                           |                               |
| National Policy for Safe Water Supply & Sanitation                             | 1998             | -                         | -                             | 24%                       | 83%                           |
| National Water Policy                                                          | 1999             | -                         | -                             | 29%                       | 0%                            |
| National Standards of Water, Sanitation and Hygiene for Schools in Bangladesh  | 2010             | 10%                       | 75%                           | 24%                       | 83%                           |
| National Strategy for Water and Sanitation Hard to Reach Areas                 | 2011             | -                         | -                             | 5%                        | 0%                            |
| Sector Development Plan                                                        | 2011             | 48%                       | 12%                           | 57%                       | 9%                            |
| National Hygiene Promotion Strategy for Water Supply and Sanitation Sector     | 2012             | 10%                       | 25%                           | 57%                       | 12%                           |
| National Strategy for WASH and Sanitation                                      | 2014             | 43%                       | 36%                           | 43%                       | 32%                           |
| Operational Guidelines for WASH in Emergencies                                 | 2017             | 52%                       | 69%                           | 71%                       | 80%                           |
| National Strategy for WASH in Healthcare Facilities 2019-2023                  | 2019             | 19%                       | 75%                           | 48%                       | 30%                           |
| Pro Poor Strategy for WASH in Bangladesh                                       | 2020             | 19%                       | 17%                           | 24%                       | 50%                           |
|                                                                                |                  | 25%                       | 44%                           | 48%                       | 47%                           |
| Cambodia                                                                       |                  |                           |                               |                           |                               |
| National Policy on Water Supply and Sanitation                                 | 2003             | -                         | -                             | 10%                       | 20%                           |
| National Strategy for Rural Water Supply, Sanitation and Hygiene               | 2011             | 38%                       | 50%                           | 57%                       | 38%                           |
| Minimum Requirement Guidelines on WASH in Schools (WinS)                       | 2016             | 10%                       | 100%                          | 14%                       | 86%                           |
| National Guidelines on Wash for Persons with Disabilities and Older People     | 2017             | 67%                       | 78%                           | 38%                       | 83%                           |
| National Guidelines for Water, Sanitation and Hygiene in Healthcare Facilities | 2018             | 19%                       | 79%                           | 14%                       | 100%                          |
| National Action Plan Rural Water Supply, Sanitation and Hygiene 2019-2023      | 2019             | -                         | -                             | 33%                       | 93%                           |
|                                                                                |                  | 22%                       | 77%                           | 28%                       | 70%                           |

**Table S2. Core concept coverage across the programme reports of Bangladesh and Cambodia**

| Policy                                                                                                                  | Publication year | Disability inclusion      |                               | Gender inclusion          |                               |
|-------------------------------------------------------------------------------------------------------------------------|------------------|---------------------------|-------------------------------|---------------------------|-------------------------------|
|                                                                                                                         |                  | Core concept coverage (%) | Core concept high quality (%) | Core concept coverage (%) | Core concept high quality (%) |
| Bangladesh                                                                                                              |                  |                           |                               |                           |                               |
| BRAC: Water, Sanitation and Hygiene: Nine years of scale and innovation in Bangladesh                                   | 2015             | -                         | -                             | 71%                       | 96%                           |
| WASHplus: Assessing Water, Sanitation, and Hygiene (WASH) in Southwestern Bangladesh                                    | 2016             | 10%                       | 100%                          | 10%                       | 100%                          |
| Department of Public Health Engineering: Bangladesh Rural Water Supply and Sanitation Project                           | 2018             | -                         | -                             | 38%                       | 100%                          |
| Bangladesh Red Crescent Society: CDI2 WASH Program - Bangladesh                                                         | 2018             | 33%                       | 90%                           | 38%                       | 100%                          |
| ADD International: Improved Sanitation for Women and Children with Disabilities living in extreme poverty in Bangladesh | 2018             | 48%                       | 91%                           | 43%                       | 88%                           |
|                                                                                                                         |                  | 18%                       | 94%                           | 40%                       | 97%                           |
| Cambodia                                                                                                                |                  |                           |                               |                           |                               |
| Child Rights Foundation: Improving Hygiene and Sanitation of Cambodia Rural Schools and Communities                     | 2015             | -                         | -                             | 10%                       | 100%                          |
| Plan International: A Retrospective Review of Phase 1 of CRSHIP                                                         | 2017             | 10%                       | 100%                          | 24%                       | 100%                          |
|                                                                                                                         |                  | 5%                        | 100%                          | 17%                       | 100%                          |
